# Supplementary material for: Ionization and separation as a strategy for significantly enhancing the thermal stability of an instable system: a case for hydroxylamine-based salts relative to that for pure hydroxylamine
Source: Royal Society of Chemistry journal article supplement (doi:10.1039/c7cp03801a), 2017-01-01
Supplement: c7cp03801a1.pdf [file c7cp03801a1.pdf]

# **Ionization and Separation as A Strategy for Significantly Enhancing the Thermal Stability of An Instable System: A Case of Hydroxylamine-based Salts Relative to Pure Hydroxylamine**

**Yu Ma, Xudong He, Liya Meng, Xianggui Xue, and Chaoyang Zhang\***

*Institute of Chemical Materials, China Academy of Engineering Physics (CAEP), P. O. Box 919-311, Mianyang, Sichuan 621900, China.*

## **Electronic Supplementary Information**

### **Table of Contents**

**S1. Decomposition temperatures of HA-based EISs.**

**S2. Typical snapshots of HA with densities of 0.14 and 0.014 g/cm<sup>3</sup> in nonreactive forcefield NVT simulations.**

**S3. The highest frequency reactions of pure HA and its aqueous solution.**

**S4. Enthalpy changes of heterolytic cleavages of H-HA<sup>+</sup> and HA molecules.**

**S5. References**

**S1. Decomposition temperature of HA-based EISs.****Table S1.** Decomposition temperature (in, °C) of HA-based EISs

| Anions-based EISs                 | T <sub>d</sub> |
|-----------------------------------|----------------|
| BT-HA <sup>1</sup>                | 205            |
| BT <sub>2</sub> O-HA <sup>2</sup> | 172            |
| DBO-HA <sup>3</sup>               | 156            |
| DNABF-HA <sup>4</sup>             | 141            |
| DNBTO-HA <sup>5</sup>             | 217            |
| BTO-HA <sup>6</sup>               | 221            |
| AFTA-HA <sup>7</sup>              | 213            |
| NTX-HA <sup>8</sup>               | 157            |
| DNAAF-HA <sup>9</sup>             | 177            |
| DPNA-HA <sup>10</sup>             | 166            |
| BNT-HA <sup>11</sup>              | 218            |
| HH <sup>12</sup>                  | 152            |
| HS <sup>12</sup>                  | 177            |
| HP <sup>12</sup>                  | 148            |
| HAP <sup>12</sup>                 | 75             |
| HN <sup>12</sup>                  | 48             |
| HA <sup>12</sup>                  | 33             |

**S2. Typical snapshots of HA with densities of 0.14 and 0.014 g/cm<sup>3</sup> in nonreactive forcefield NVT simulations..**

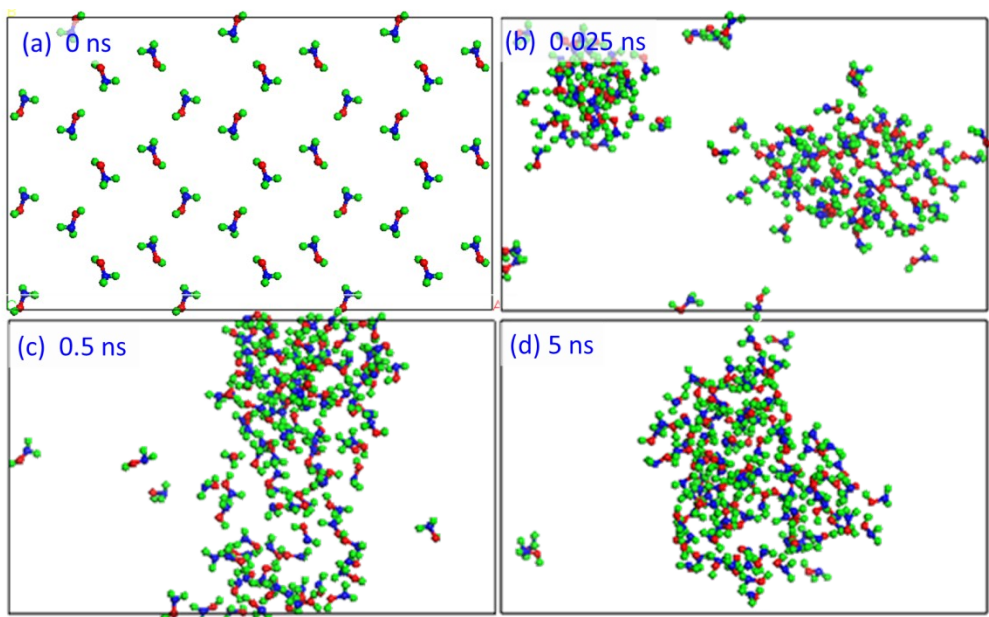

**Fig. s1** Typical snapshots of NVT (T=500 K) MD simulations of HA with a density of 0.14 g/cm<sup>3</sup>.

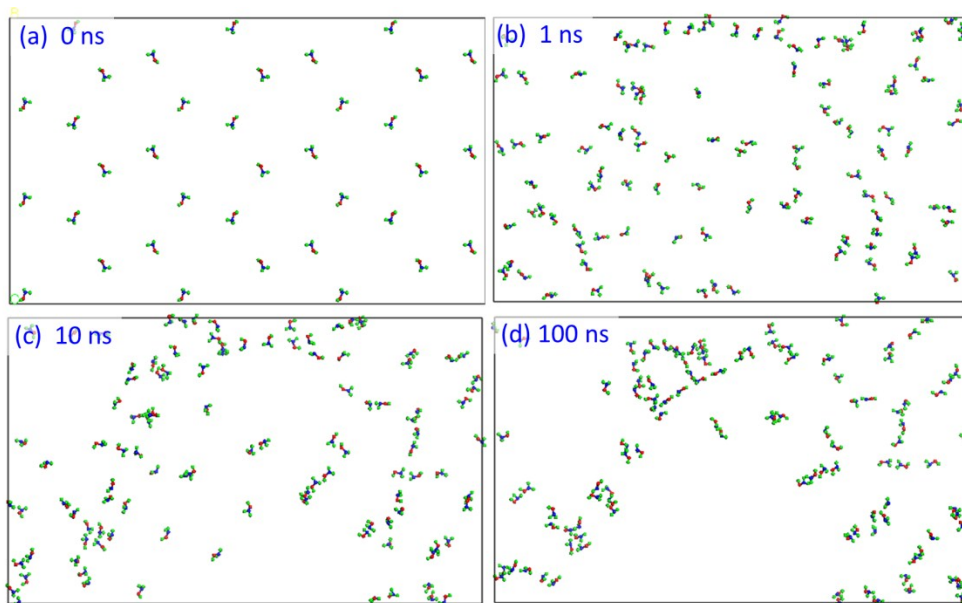

**Fig. s2** Typical snapshots of NVT (T=500 K) MD simulations of HA with a density of 0.014 g/cm<sup>3</sup>.

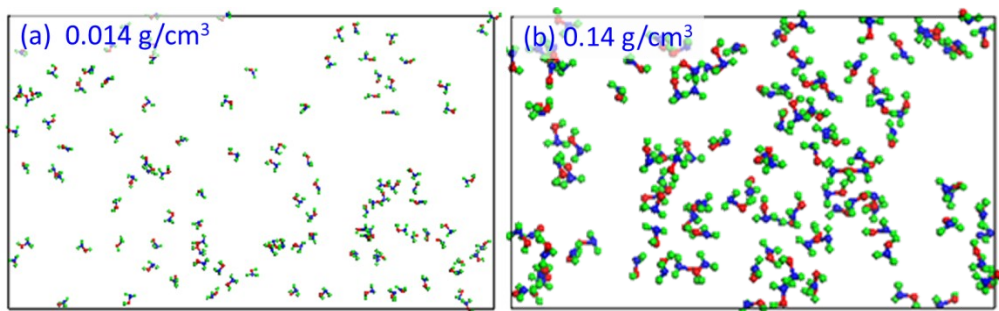

**Fig. s3** Final snapshots at the 1000 K by the end of the simulation time of 30 ps with ReaxFF for Cases III (a) and II (b).

### S3. The highest frequency reactions of pure HA and its aqueous solution heated at 1000 K.

**Table S2.** The highest frequency reactions within the initial 20 ps of pure HA (the reverse reactions are expunged).

| Cases                                   | Reactions                                                          | Frequencies |
|-----------------------------------------|--------------------------------------------------------------------|-------------|
| I: HA<br>d=1.4g/cm <sup>3</sup>         | H <sub>2</sub> ON+OH→H <sub>3</sub> O <sub>2</sub> N               | 5           |
|                                         | NH <sub>2</sub> OH→NH <sub>2</sub> +OH                             | 5           |
|                                         | NH <sub>2</sub> OH+OH→H <sub>4</sub> O <sub>2</sub> N              | 5           |
|                                         | 2NH <sub>2</sub> OH→H <sub>5</sub> ON <sub>2</sub> +OH             | 5           |
|                                         | HNO→H+NO                                                           | 5           |
|                                         | OH+HNO→H <sub>2</sub> O+NO                                         | 5           |
|                                         | H <sub>5</sub> ON <sub>2</sub> →H <sub>2</sub> ON+NH <sub>3</sub>  | 5           |
| II: HA<br>d=0.14g/cm <sup>3</sup>       | NH <sub>2</sub> OH→NH <sub>2</sub> +OH                             | 2           |
|                                         | H <sub>4</sub> N <sub>2</sub> +2OH→2NH <sub>2</sub> OH             | 2           |
|                                         | 2NH <sub>2</sub> OH→H <sub>2</sub> ON+NH <sub>3</sub> +OH          | 2           |
|                                         | NH <sub>2</sub> +NH <sub>2</sub> OH→H <sub>5</sub> ON <sub>2</sub> | 2           |
| III: HA<br>d=0.014g/cm <sup>3</sup>     | No Reactions                                                       |             |
| IV: HA/water<br>d=1.11g/cm <sup>3</sup> | NH <sub>2</sub> OH+OH→H <sub>4</sub> O <sub>2</sub> N              | 3           |
|                                         | NH <sub>2</sub> OH+OH→H <sub>2</sub> O+H <sub>2</sub> ON           | 3           |
|                                         | NH <sub>2</sub> OH+HNO→H <sub>4</sub> ON+NO                        | 2           |
|                                         | H+H <sub>3</sub> O <sub>2</sub> N→H <sub>4</sub> O <sub>2</sub> N  | 2           |
|                                         | H <sub>4</sub> ON→H+NH <sub>2</sub> OH                             | 2           |
|                                         | OH+HNO→H <sub>2</sub> O+NO                                         | 2           |

**Table S3.** The highest frequency reactions within the initial 30 ps of pure HA (the reverse reactions are expunged).

| Cases                                   | Reactions                                                              | Reaction No. | Frequencies |
|-----------------------------------------|------------------------------------------------------------------------|--------------|-------------|
| I: HA<br>d=1.4g/cm <sup>3</sup>         | OH+HON→H <sub>2</sub> O+NO                                             | (15)         | 5           |
|                                         | NH <sub>2</sub> OH+OH→H <sub>4</sub> O <sub>2</sub> N                  | (3)          | 5           |
|                                         | H <sub>2</sub> ON+OH→H <sub>3</sub> O <sub>2</sub> N                   | (13)         | 5           |
|                                         | NH <sub>2</sub> OH+OH→H <sub>2</sub> O+H <sub>2</sub> ON               | (8)          | 5           |
|                                         | NH <sub>3</sub> +NH <sub>2</sub> OH→H <sub>5</sub> N <sub>2</sub> +OH  | (5)          | 5           |
|                                         | H <sub>2</sub> O <sub>2</sub> N→H <sub>2</sub> O+NO                    | (21)         | 5           |
|                                         | NH <sub>2</sub> OH→H <sub>2</sub> N+OH                                 | (12)         | 5           |
|                                         | 2NH <sub>2</sub> OH→H <sub>5</sub> ON <sub>2</sub> +OH                 | (1)          | 5           |
| II: HA<br>d=0.14g/cm <sup>3</sup>       | NH <sub>2</sub> OH→NH <sub>2</sub> +OH                                 | (12)         | 4           |
|                                         | N <sub>2</sub> H <sub>4</sub> +2OH→2NH <sub>2</sub> OH                 | (16)         | 2           |
|                                         | 2NH <sub>2</sub> OH→H <sub>2</sub> ON+NH <sub>3</sub> +OH              | (17)         | 2           |
|                                         | 2NH <sub>2</sub> OH→H <sub>6</sub> O <sub>2</sub> N <sub>2</sub>       | (22)         | 2           |
|                                         | NH <sub>2</sub> +NH <sub>2</sub> OH→H <sub>5</sub> ON <sub>2</sub>     | (6)          | 2           |
|                                         | H <sub>5</sub> ON <sub>2</sub> →N <sub>2</sub> H <sub>4</sub> +OH      | (23)         | 2           |
| III: HA<br>d=0.014g/cm <sup>3</sup>     | No Reactions                                                           |              |             |
| IV: HA/water<br>d=1.11g/cm <sup>3</sup> | NH <sub>2</sub> OH→NH <sub>2</sub> +OH                                 | (12)         | 4           |
|                                         | NH <sub>2</sub> OH+OH→H <sub>2</sub> O+H <sub>2</sub> ON               | (8)          | 4           |
|                                         | H <sub>2</sub> ON+NH <sub>3</sub> →NH <sub>2</sub> +NH <sub>2</sub> OH | (24)         | 3           |

#### S4. Comparisons of NBO charges and bond length of related molecules.

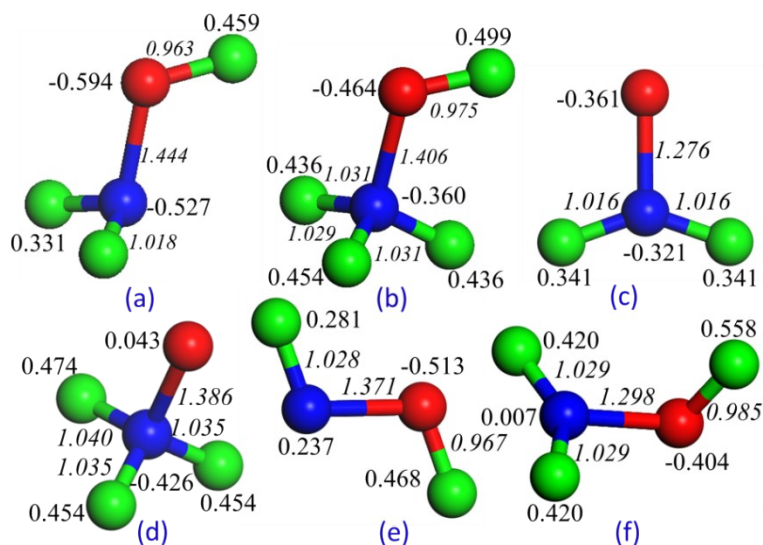

**Fig. s4** Comparisons of NBO charges (in normal) and bond length (in italic) among HA (a), H-HA<sup>+</sup> (b), NH<sub>2</sub>O (c), NH<sub>3</sub>O<sup>+</sup> (d), NHOH (e) and NH<sub>2</sub>OH<sup>+</sup> (f).

As to the above-mentioned strengthening of N-H and O-H bonds by protonation and the much more increase in BDE of the O-H bond than the N-H bond, they can be deduced by comparing the molecular stability of H-partitioned products from HA and H-HA<sup>+</sup>. At first, regarding the enhanced strength of O-H and N-H bonds by protonation, we compare the molecular stability of NH<sub>2</sub>O and NH<sub>3</sub>O<sup>+</sup> (corresponding to the H-partitioned products by O-H break of HA and H-HA<sup>+</sup>, respectively), and of NHOH and NH<sub>2</sub>OH<sup>+</sup> (corresponding to the H-partitioned products by N-H break of HA and H-HA<sup>+</sup>, respectively). [Fig. s4\(c\)](#) exhibits a shorter N-O bond, as well as shorter N-H bonds, than [Fig. s4\(d\)](#), implying the higher stability of NH<sub>2</sub>O. The lower stability of NH<sub>3</sub>O<sup>+</sup> suggests more energy required to break the O-H in H-HA<sup>+</sup>, the larger BDE of the O-H bond. Even though the N-O bond in NH<sub>2</sub>O ([Fig. s4\(e\)](#)) is longer than that in NH<sub>2</sub>OH<sup>+</sup> ([Fig. s4\(f\)](#)) (1.371 vs. 1.298 Å), the electrostatic attraction between the O and N atoms in NH<sub>2</sub>O are much stronger with more opposite charges, showing the lower stability of NH<sub>2</sub>OH<sup>+</sup>, or the larger BDE of the O-H bond in H-HA<sup>+</sup>. Overall, both the N-H and O-H bonds are strengthened after protonation.

Furthermore, it is interesting to find that the strength order of N-H and O-H bonds is reversed

after protonation, i.e., the strength of the O-H bond increases much more than the N-H bond, as 168.3 versus 32.6 kJ/mol. This can also be understood by analyzing the molecular stability of H-partitioned products. The length of the N-O bond in Fig. s4(c) is shorter  $\sim 0.1$  Å than that in Fig. s4(e), implying the higher stability of NH<sub>2</sub>O in contrast to NHOH, i.e., the more energetically favored H-partition by O-H break. Thus, the higher BDE of the N-H bond relative to the O-H bond of HA in Fig. 8 (341 vs. 300.2 kJ/mol) is reasonable. Moreover, NH<sub>3</sub>O<sup>+</sup> (Fig. s4(d)) possesses longer C-N bond length of  $\sim 0.09$  Å than NH<sub>2</sub>OH<sup>+</sup> (Fig. s4(f)); meanwhile, these two isomeric cations possess similar circumstances of electrostatic attraction between the N and O atoms of the N-O bonds, as N<sup>-0.426</sup>-O<sup>+0.043</sup> vs. N<sup>+0.007</sup>-O<sup>-0.404</sup>. That is, NH<sub>3</sub>O<sup>+</sup> is more energetically unstable than NH<sub>2</sub>OH<sup>+</sup>, or the O-H bond is stronger than the N-H bond in H-HA<sup>+</sup> (468.5 vs. 373.6 kJ/mol). In a word, the BDE of the O-H bond in H-HA<sup>+</sup> is larger than that in HA, while the BDE of the N-H bond in H-HA<sup>+</sup> is lower than that in HA. This order reversion suggests more BDE increasing of the O-H bond after protonation.

### S5. Enthalpy changes of heterolytic cleavages of H-HA<sup>+</sup> and HA molecules.

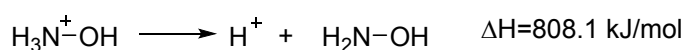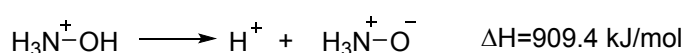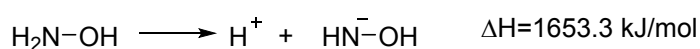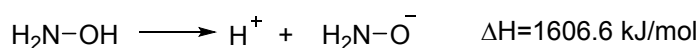

### S6. References

- (1) Fischer, N.; Izsák, D.; Klapötke, T.; Rappenglück, S.; Stierstorfer, J. *Chem. Eur. J.* **2012**, *18*, 4051 - 4062.
- (2) Fischer, N.; Gao, L.; Klapötke, T.; Stierstorfer, J. *Polyhedron*. **2013**, *51*, 201-210.
- (3) Klapötke, T.; Mayr, N.; Stierstorfer, J.; Weyrauther, M. *Chem. Eur. J.* **2014**, *20*, 1410- 1417.
- (4) Fischer, D.; Klapötke, T.; Reymann, M.; Stierstorfer, J. *Chem. Eur. J.* **2014**, *20*, 6401-6411.
- (5) Dippold, A.; Klapötke, T. *J. Am. Chem. Soc.* **2013**, *135*, 9931-9938.

- (6) Fischer, N.; Fischer, D.; Klapötke, T.; Piercey, D. G.; Stierstorfer, J. *J. Mater. Chem.* **2012**, *22*, 20418-20422.
- (7) Zhang, J. H.; Mitchell, L. A.; Parrish, D. A.; Shreeve, J. M. *J. Am. Chem. Soc.* **2015**, *137*, 10532-10535.
- (8) Göbel, M.; Karaghiosoff, K.; Klapötke, T.; Piercey, D. G.; Stierstorfer, J. *J. Am. Chem. Soc.* **2010**, *132*, 17216-17226.
- (9) Zhang, J. H.; Shreeve, J. M. *J. Am. Chem. Soc.* **2014**, *136*, 4437-4445.
- (10) Yin, P.; Parrish, D. A.; Shreeve, J. M. *J. Am. Chem. Soc.* **2015**, *137*, 4778-4786.
- (11) Wang, R.; Xu, H.; Guo, Y.; Sa, R.; Shreeve, J. M. *J. Am. Chem. Soc.* **2010**, *132*, 11904-11905.
- (12) Cheng, Y. G. *Chin. J. Explosive*, **1992**, *2*, 51-58.
